# Supplementary material for: One-pot synthesis, characterisation and kinetic stability of novel side-bridged pentaazamacrocyclic copper(ii) complexes
Source: Royal Society of Chemistry journal article supplement (doi:10.1039/c3ra47450j), 2014-01-01
Supplement: c3ra47450j2.pdf [file c3ra47450j2.pdf]

## Electronic Supplementary Information (ESI)

# One-Pot Synthesis, Characterisation and Kinetic Stability of Novel Side-Bridged Pentaazamacrocyclic Copper(II) Complexes

Helen M. Betts,<sup>ab\*</sup> Sofia I. Pascu,<sup>c\*</sup> Antoine Buchard,<sup>c</sup> Paul D. Bonnitcha,<sup>a</sup> and Jonathan R. Dilworth<sup>a\*</sup>

<sup>a</sup> University of Oxford, Chemistry Research Laboratory, Mansfield Road, Oxford, OX1 3TA, UK.  
Tel: 0044 (0)1865 272689.

<sup>b</sup> Present address: Nottingham University Hospitals NHS Trust, PET/CT Centre, Nottingham City Hospital, Nottingham, NG5 1PB.

<sup>c</sup> University of Bath, Chemistry Department, Bath, BA2 7AY, UK.

### Computed free enthalpies of formation of complexes 7-Benzyl-1,5,7,9,13-penta-aza-(1,13-ethano)-cyclopentadecane copper(II) dichloride and copper(II) cyclam dichloride

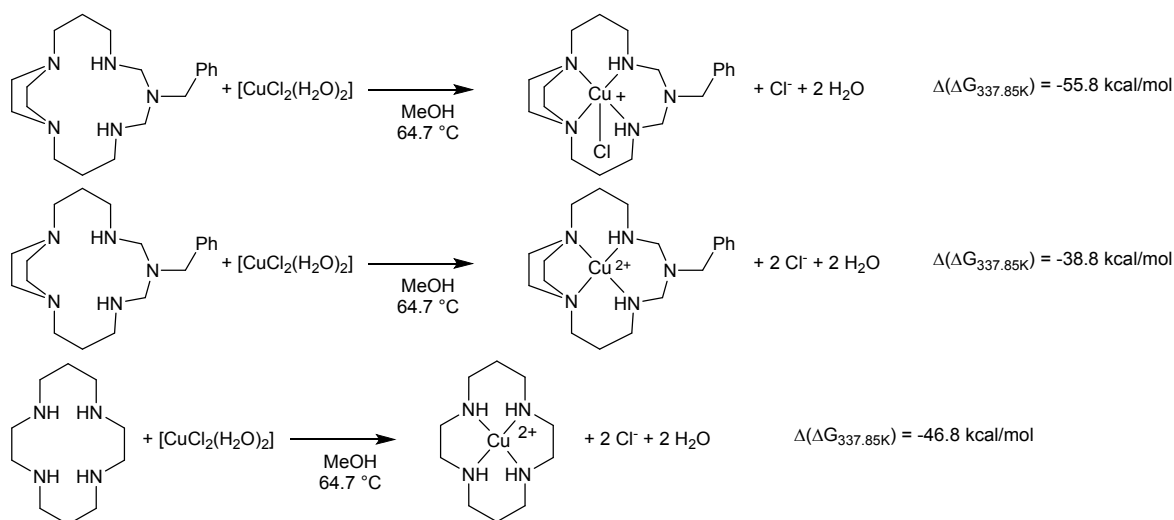

Thermodynamics of the coordination reactions between copper(II) chloride dihydrate and ligands 7-Benzyl-1,5,7,9,13-penta-aza-(1,13-ethano)-cyclopentadecane or 1,4,8,11-Tetraazacyclotetradecane (cyclam) were examined using DFT calculations. Full coordinates for all stationary points, together with computed free Gibbs energy and vibrational frequency data, are also available via the corresponding Gaussian 09 output files, stored in the digital repository (DOI: 10.6084/m9.figshare.907517):

[http://figshare.com/articles/One\\_Pot\\_Synthesis\\_Characterisation\\_and\\_Kinetic\\_Stability\\_of\\_Novel\\_Side\\_Bridged\\_Pentaazamacrocyclic\\_Copper\\_II\\_Complexes\\_/907517](http://figshare.com/articles/One_Pot_Synthesis_Characterisation_and_Kinetic_Stability_of_Novel_Side_Bridged_Pentaazamacrocyclic_Copper_II_Complexes_/907517)

or

<http://dx.doi.org/10.6084/m9.figshare.907517>

**Table S1.** Thermodynamic data evaluations

| <i>System</i>                                                                                                             | <i>G (Hartree)</i>                                        | $\Delta(\Delta G_{337.85K})$<br>( <i>kcal mol<sup>-1</sup></i> ) |
|---------------------------------------------------------------------------------------------------------------------------|-----------------------------------------------------------|------------------------------------------------------------------|
| [CuCl <sub>2</sub> (H <sub>2</sub> O) <sub>2</sub> ]                                                                      | -2713.526338                                              | -                                                                |
| H <sub>2</sub> O                                                                                                          | -76.405277                                                | -                                                                |
| Cl <sup>-</sup>                                                                                                           | -460.362767                                               | -                                                                |
| 7-Benzyl-1,5,7,9,13-penta-aza-(1,13-ethano)-cyclopentadecane                                                              | -1016.470419                                              | -                                                                |
| 1,4,8,11-Tetraazacyclotetradecane (cyclam)                                                                                | -613.787527                                               | -                                                                |
| 7-Benzyl-1,5,7,9,13-penta-aza-(1,13-ethano)-cyclopentadecane + [CuCl <sub>2</sub> (H <sub>2</sub> O) <sub>2</sub> ]       | -3729.996757                                              | 0.0                                                              |
| 7-Benzyl-1,5,7,9,13-penta-aza-(1,13-ethano)-cyclopentadecane copper(II) chloride (+ 2H <sub>2</sub> O + Cl <sup>-</sup> ) | -3116.912393<br>(-2*76.405277 -460.362767=-3730.085714)   | -55.8                                                            |
| 7-Benzyl-1,5,7,9,13-penta-aza-(1,13-ethano)-cyclopentadecane copper(II) (+ 2H <sub>2</sub> O + 2Cl <sup>-</sup> )         | -2656.522535<br>(-2*76.405277 -2*460.362767=-3730.058623) | -38.8                                                            |
| cyclam + [CuCl <sub>2</sub> (H <sub>2</sub> O) <sub>2</sub> ]                                                             | -3327.313865                                              | 0.0                                                              |
| copper(II) cyclam dichloride (+ 2H <sub>2</sub> O + 2Cl <sup>-</sup> )                                                    | -2253.852408<br>(-2*76.405277 -2*460.362767=-3327.388496) | -46.8                                                            |

## Optimized geometries and computed free energies

Full coordinates for all the stationary points, together with their 3 lowest calculated vibrations and their computed Free Gibbs Energy are reported below.

### 7-Benzyl-1,5,7,9,13-penta-aza-(1,13-ethano)-cyclopentadecane copper(II)

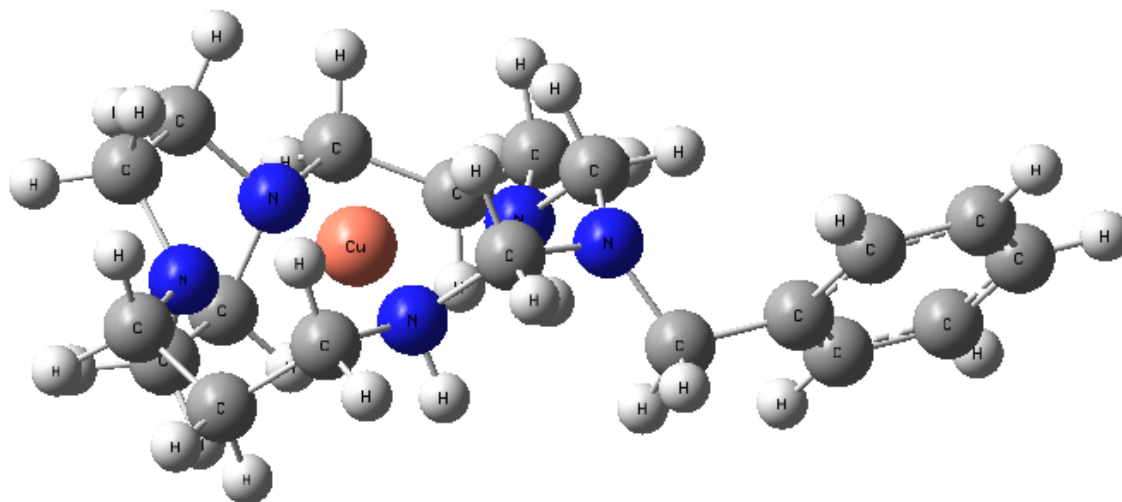

|     |            |            |             |
|-----|------------|------------|-------------|
| 2 2 |            |            |             |
| N   | 5.30837132 | 2.07907240 | 2.21144240  |
| N   | 5.46402054 | 4.04499276 | 0.72761146  |
| C   | 5.23249063 | 0.98001200 | 3.19799492  |
| C   | 4.38589442 | 1.30800553 | 4.40928899  |
| C   | 5.01693287 | 2.36616134 | 5.28901332  |
| C   | 5.59069139 | 4.70268731 | 5.64825968  |
| N   | 5.23006079 | 6.06329861 | 5.44263907  |
| C   | 5.67404522 | 6.64013068 | 4.22218743  |
| C   | 5.37181717 | 6.93409062 | 1.83109726  |
| C   | 4.78697248 | 6.44463270 | 0.52246776  |
| C   | 5.56857579 | 5.28994248 | -0.06449316 |
| C   | 4.24546136 | 3.28061525 | 0.36584406  |
| C   | 4.13007344 | 2.07776981 | 1.31045969  |
| C   | 6.52731606 | 1.94730584 | 1.38196677  |
| C   | 6.64477599 | 3.18464877 | 0.49227383  |
| C   | 3.90692749 | 6.48002962 | 5.92365733  |
| Cu  | 5.26261163 | 4.06761543 | 2.78828396  |
| H   | 6.25628886 | 0.76693271 | 3.52803146  |
| H   | 4.86358175 | 0.07939891 | 2.68483648  |
| H   | 4.28316730 | 0.38941471 | 4.99762622  |
| H   | 3.36324832 | 1.59849038 | 4.12906228  |
| H   | 6.09472963 | 2.18272121 | 5.39497404  |
| H   | 4.58133986 | 2.33744135 | 6.29779448  |
| H   | 6.66088388 | 4.56252713 | 5.45295477  |
| H   | 5.39471711 | 4.42419778 | 6.69344334  |
| H   | 5.49822952 | 7.72468102 | 4.24781407  |
| H   | 6.75067170 | 6.46929308 | 4.09493763  |
| H   | 5.03655983 | 7.95933583 | 2.03915013  |
| H   | 6.46856468 | 6.95716227 | 1.77403637  |

|   |            |            |             |
|---|------------|------------|-------------|
| H | 4.82223749 | 7.26803988 | -0.19946113 |
| H | 3.72223770 | 6.19727361 | 0.64151564  |
| H | 6.62975221 | 5.56309817 | -0.10704509 |
| H | 5.24851688 | 5.07213887 | -1.09430655 |
| H | 3.37734225 | 3.94105159 | 0.45543920  |
| H | 4.32421401 | 2.96725875 | -0.68536834 |
| H | 3.22160798 | 2.13461576 | 1.91833380  |
| H | 4.10525389 | 1.12715991 | 0.75799710  |
| H | 7.38780910 | 1.86641958 | 2.05216256  |
| H | 6.46341281 | 1.01744062 | 0.79743237  |
| H | 7.53796044 | 3.76516240 | 0.74308107  |
| H | 6.69620710 | 2.92555765 | -0.57556845 |
| H | 3.82946217 | 7.55790242 | 5.72700625  |
| H | 3.07688393 | 6.00435733 | 5.36965740  |
| C | 3.72980452 | 6.20725359 | 7.39196655  |
| C | 2.76437267 | 5.30398458 | 7.83671593  |
| C | 4.54155465 | 6.85330276 | 8.32922158  |
| C | 2.60530335 | 5.04953562 | 9.19881788  |
| H | 2.12886082 | 4.79555316 | 7.11121699  |
| C | 4.38473913 | 6.60291872 | 9.68799004  |
| H | 5.29869162 | 7.55633364 | 7.98398149  |
| C | 3.41524843 | 5.69916471 | 10.12559112 |
| H | 1.85034827 | 4.34237625 | 9.53366573  |
| H | 5.01670390 | 7.11553244 | 10.40939359 |
| H | 3.29336736 | 5.50465456 | 11.18843632 |
| N | 5.00872778 | 6.08673285 | 2.99283541  |
| H | 3.99680350 | 6.18758707 | 3.11772859  |
| N | 4.85308606 | 3.74206065 | 4.76052488  |
| H | 3.85501935 | 3.96194598 | 4.83591824  |

Sum of electronic and thermal Free Energies= -2656.522535  
Frequencies -- 24.1613 35.1103 49.0799

**Copper(II) chloride dihydrate**

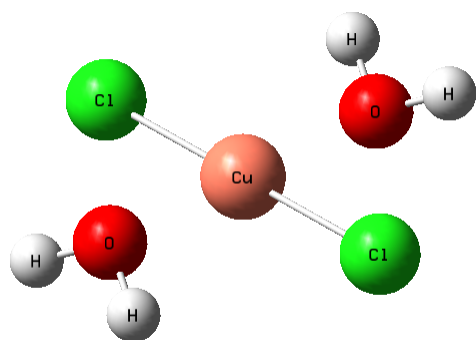

0 2

|    |             |             |             |
|----|-------------|-------------|-------------|
| Cu | -0.00009700 | 0.00018700  | 0.00007900  |
| Cl | -2.22632500 | -0.00133000 | -0.00015300 |
| Cl | 2.22622100  | 0.00087000  | -0.00012900 |
| O  | 0.00210600  | -1.99609500 | 0.09330800  |
| H  | 0.78830900  | -2.39371900 | -0.30994200 |
| H  | -0.78206700 | -2.39666100 | -0.31106100 |
| O  | -0.00188000 | 1.99632000  | -0.09306100 |
| H  | 0.78343600  | 2.39632100  | 0.30964200  |
| H  | -0.78690400 | 2.39464700  | 0.31187200  |

Sum of electronic and thermal Free Energies= -2713.526338

Frequencies -- 33.2317 131.9846 138.0293

## Water

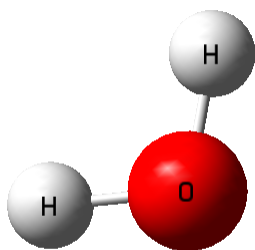

0 1

|   |            |             |             |
|---|------------|-------------|-------------|
| O | 0.00000000 | 0.00000000  | 0.11739500  |
| H | 0.00000000 | 0.76400300  | -0.46958000 |
| H | 0.00000000 | -0.76400300 | -0.46958000 |

Sum of electronic and thermal Free Energies= -76.405277

Frequencies -- 1589.7778 3861.0428 3980.0074

## Chloride

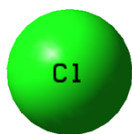

-1 1

Cl 0.00000000 0.00000000 0.00000000

Sum of electronic and thermal Free Energies= -460.362767

Frequencies -- None

### 7-Benzyl-1,5,7,9,13-penta-aza-(1,13-ethano)-cyclopentadecane

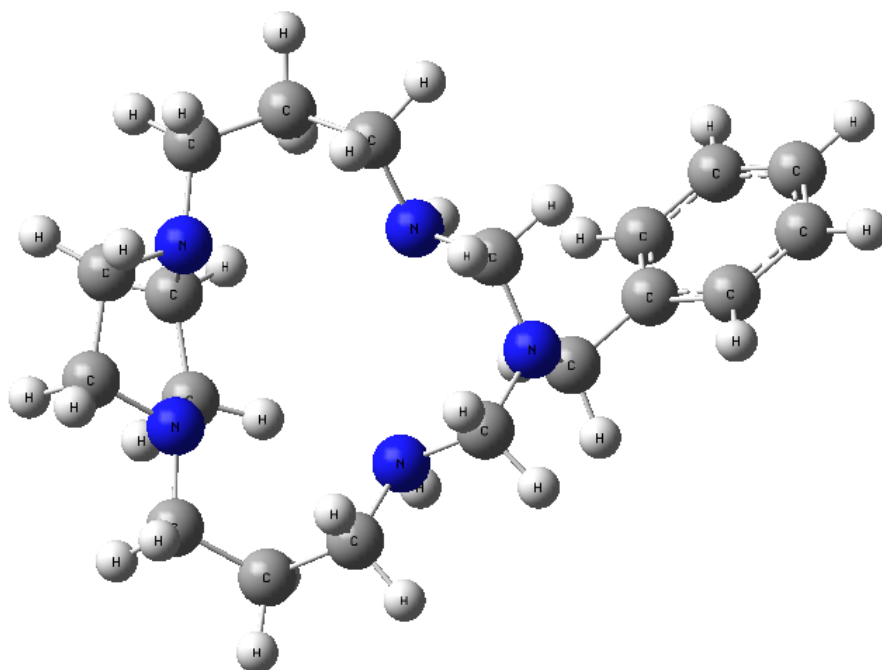

|     |             |             |             |
|-----|-------------|-------------|-------------|
| 0 1 |             |             |             |
| N   | 2.95407449  | 0.04580756  | 2.78228379  |
| N   | 3.08290966  | 0.03331533  | 0.19391172  |
| C   | 2.82625869  | 0.10737741  | 4.22285652  |
| C   | 1.45717323  | -0.30589686 | 4.75343293  |
| C   | 0.29061077  | 0.51916102  | 4.21350711  |
| C   | -1.40132758 | 0.76604395  | 2.51062952  |
| N   | -1.96372943 | 0.37859953  | 1.23967523  |
| C   | -1.27036100 | 0.76989936  | 0.03839088  |
| C   | 0.57420467  | 0.49749065  | -1.50203124 |
| C   | 1.78384311  | -0.33865817 | -1.91456346 |
| C   | 3.10522203  | 0.04231028  | -1.25312813 |
| C   | 2.81056970  | -1.28867748 | 0.74022107  |
| C   | 3.03085965  | -1.30363392 | 2.25909388  |
| C   | 4.08553010  | 0.81287080  | 2.28858883  |
| C   | 4.30030476  | 0.55207933  | 0.78747197  |
| C   | -2.58336106 | -0.93638294 | 1.19138545  |
| H   | 3.00830374  | 1.15198023  | 4.52051881  |
| H   | 3.61703367  | -0.49808175 | 4.72123011  |
| H   | 1.49677871  | -0.20672929 | 5.84662300  |
| H   | 1.26669599  | -1.37278550 | 4.56332487  |
| H   | 0.65699962  | 1.51807201  | 3.92689025  |
| H   | -0.45352707 | 0.68463628  | 5.01828560  |
| H   | -0.98976445 | 1.77888950  | 2.39589857  |
| H   | -2.23399871 | 0.84195384  | 3.24015272  |
| H   | -2.02034228 | 0.78972445  | -0.78134719 |
| H   | -0.91571484 | 1.80308627  | 0.16901017  |
| H   | -0.11622502 | 0.59304012  | -2.36463848 |
| H   | 0.90215196  | 1.52107607  | -1.25892894 |
| H   | 1.93610066  | -0.23184255 | -2.99682753 |
| H   | 1.56087699  | -1.40454815 | -1.75647635 |



|   |             |             |             |
|---|-------------|-------------|-------------|
| H | 3.37254749  | 1.06125156  | -1.57274711 |
| H | 3.90231000  | -0.63167712 | -1.64375827 |
| H | 1.77215904  | -1.55102210 | 0.50822583  |
| H | 3.46742582  | -2.04884261 | 0.26274361  |
| H | 2.26492535  | -1.92638499 | 2.73467115  |
| H | 4.01489684  | -1.75812176 | 2.51282087  |
| H | 3.88758356  | 1.87748514  | 2.47670609  |
| H | 5.01570625  | 0.55089832  | 2.83914903  |
| H | 4.58090973  | 1.48310223  | 0.27958451  |
| H | 5.14489239  | -0.15616981 | 0.63455083  |
| H | -2.98197445 | -1.06361179 | 0.17250427  |
| H | -1.85876177 | -1.75989263 | 1.34345947  |
| C | -3.70807544 | -1.08164819 | 2.18455140  |
| C | -3.66908193 | -2.05659060 | 3.18097588  |
| C | -4.81754367 | -0.23274853 | 2.11527004  |
| C | -4.71422307 | -2.18340317 | 4.09713893  |
| H | -2.81051011 | -2.72559913 | 3.24219681  |
| C | -5.86289048 | -0.35593413 | 3.02394746  |
| H | -4.85017455 | 0.53196750  | 1.33991288  |
| C | -5.81262674 | -1.33234780 | 4.02067754  |
| H | -4.66635434 | -2.94601495 | 4.87114379  |
| H | -6.72152263 | 0.30849678  | 2.95583864  |
| H | -6.62882497 | -1.42704682 | 4.73318057  |
| N | -0.32788746 | -0.07716230 | 3.03294997  |
| H | -0.70900904 | -0.98521474 | 3.29707934  |
| N | -0.11283066 | -0.03844359 | -0.33160811 |
| H | -0.42469815 | -0.98550459 | -0.54663148 |

Sum of electronic and thermal Free Energies= -1016.470419

Frequencies -- 28.8244 35.2271 49.0897

7-Benzyl-1,5,7,9,13-penta-aza-(1,13-ethano)-cyclopentadecane copper(II) dichloride

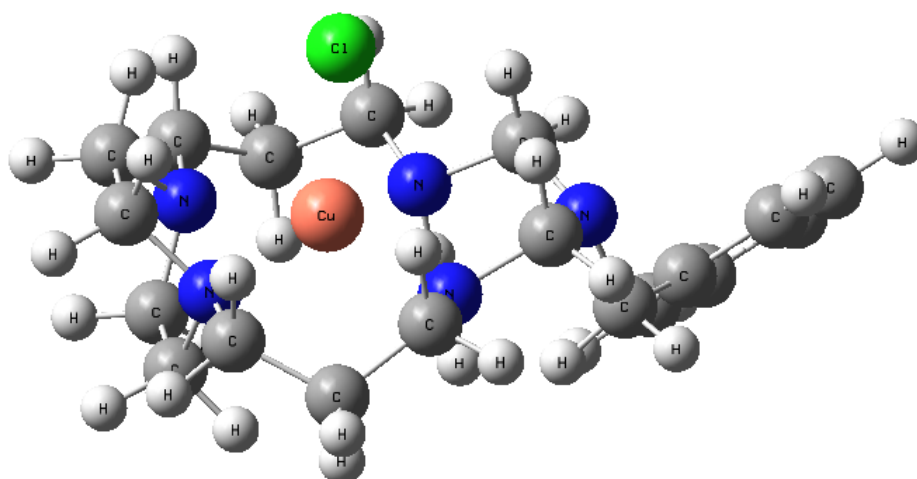

|    |            |            |             |
|----|------------|------------|-------------|
| 12 |            |            |             |
| Cl | 8.06642455 | 4.18454185 | 3.06493651  |
| N  | 5.30679071 | 2.09562635 | 2.27879361  |
| N  | 5.39545443 | 4.03549507 | 0.75329691  |
| C  | 5.31962031 | 1.01085150 | 3.27700851  |
| C  | 4.65212099 | 1.36154782 | 4.58941625  |
| C  | 5.37097896 | 2.44937816 | 5.36104028  |
| C  | 5.76056991 | 4.82082351 | 5.70675653  |
| N  | 5.32901050 | 6.15754603 | 5.45423920  |
| C  | 5.79705260 | 6.73434563 | 4.23631491  |
| C  | 5.60488939 | 6.92959215 | 1.82700374  |
| C  | 4.90921921 | 6.49184898 | 0.55424789  |
| C  | 5.51640833 | 5.25299935 | -0.06910595 |
| C  | 4.03792281 | 3.44949103 | 0.68433390  |
| C  | 3.99564079 | 2.22007871 | 1.60483153  |
| C  | 6.32945214 | 1.83413503 | 1.24633844  |
| C  | 6.35591734 | 3.01713815 | 0.28113674  |
| C  | 3.94495500 | 6.48020724 | 5.81659950  |
| Cu | 5.64427558 | 4.09652585 | 2.84441413  |
| H  | 6.37229978 | 0.76694570 | 3.47079285  |
| H  | 4.85762023 | 0.11593647 | 2.82924133  |
| H  | 4.64846004 | 0.45297133 | 5.20263792  |
| H  | 3.59412393 | 1.62818090 | 4.45214389  |
| H  | 6.45801017 | 2.28745304 | 5.34173471  |
| H  | 5.05573612 | 2.42908411 | 6.41548776  |
| H  | 6.84089239 | 4.74164240 | 5.53635356  |
| H  | 5.54703898 | 4.55971780 | 6.75368255  |
| H  | 5.56640145 | 7.81019724 | 4.23816479  |
| H  | 6.88351541 | 6.60684461 | 4.15516175  |
| H  | 5.37609615 | 7.98623040 | 2.02995251  |
| H  | 6.69589533 | 6.84511104 | 1.72345462  |
| H  | 5.00043279 | 7.29938646 | -0.18135345 |
| H  | 3.83012133 | 6.37543746 | 0.72966362  |
| H  | 6.58844071 | 5.42812651 | -0.22596239 |
| H  | 5.07319483 | 5.05465586 | -1.05848849 |
| H  | 3.30871407 | 4.20237754 | 1.00010939  |
| H  | 3.81164743 | 3.18185171 | -0.35973976 |

|                                              |            |            |              |
|----------------------------------------------|------------|------------|--------------|
| H                                            | 3.21311558 | 2.32464251 | 2.36266944   |
| H                                            | 3.79210337 | 1.29666529 | 1.04014166   |
| H                                            | 7.29473581 | 1.73088240 | 1.75113625   |
| H                                            | 6.09525750 | 0.88681611 | 0.73599631   |
| H                                            | 7.35042442 | 3.47207269 | 0.26490103   |
| H                                            | 6.08948217 | 2.72328651 | -0.74625749  |
| H                                            | 3.82157831 | 7.55944992 | 5.64939402   |
| H                                            | 3.19948044 | 5.98162753 | 5.16834968   |
| C                                            | 3.63930877 | 6.14214464 | 7.24974669   |
| C                                            | 2.68369141 | 5.17621183 | 7.56543951   |
| C                                            | 4.32207726 | 6.78669447 | 8.28566781   |
| C                                            | 2.40661954 | 4.85866591 | 8.89513651   |
| H                                            | 2.14655502 | 4.66847747 | 6.76393725   |
| C                                            | 4.04977638 | 6.47167621 | 9.61246877   |
| H                                            | 5.07264500 | 7.53756598 | 8.04212688   |
| C                                            | 3.09010289 | 5.50608111 | 9.92020858   |
| H                                            | 1.65869542 | 4.10450524 | 9.12795051   |
| H                                            | 4.58375536 | 6.98229277 | 10.41046925  |
| H                                            | 2.87715603 | 5.26145264 | 10.95809200  |
| N                                            | 5.20929103 | 6.12696085 | 3.00370425   |
| H                                            | 4.19137982 | 6.19941813 | 3.08252444   |
| N                                            | 5.11510140 | 3.80182811 | 4.82418620   |
| H                                            | 4.10329731 | 3.94982119 | 4.87184339   |
| Sum of electronic and thermal Free Energies= |            |            | -3116.912393 |
| Frequencies --                               | 21.3573    | 34.8435    | 47.2832      |

## Cyclam

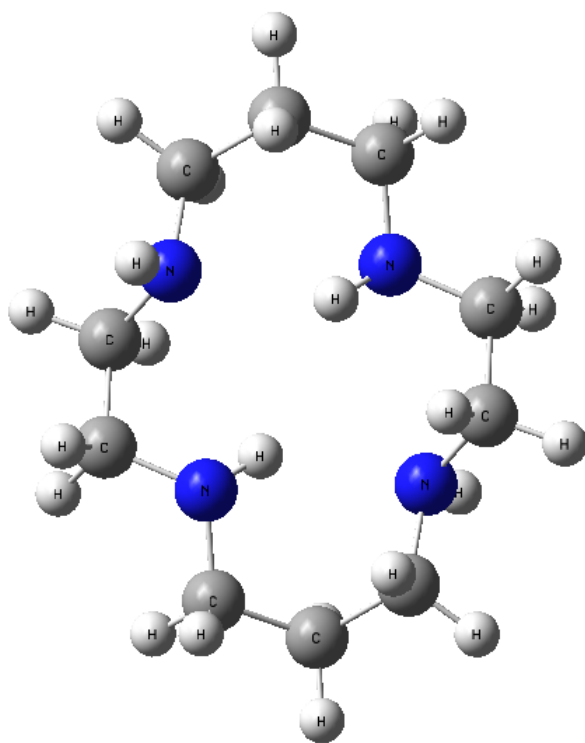

|     |             |             |             |
|-----|-------------|-------------|-------------|
| 0 1 |             |             |             |
| N   | -0.20991600 | 2.02692800  | 0.82283400  |
| N   | 0.80041500  | -0.56936300 | 1.64568400  |
| C   | 1.11897100  | 1.84948400  | 1.38208200  |
| C   | 1.20026000  | 0.65241000  | 2.31114000  |
| C   | 1.37693300  | -1.80194200 | 2.15264500  |
| C   | 1.53360800  | -2.86717100 | 1.07184300  |
| C   | -0.29591500 | 3.06346300  | -0.20312200 |
| H   | -0.87636700 | 2.22271800  | 1.56747000  |
| H   | 0.87026900  | -0.51549200 | 0.63076900  |
| H   | 1.80752700  | 1.68195300  | 0.53753900  |
| H   | 1.48794200  | 2.74755100  | 1.91510500  |
| H   | 2.24197400  | 0.59271600  | 2.68432500  |
| H   | 0.57120800  | 0.83044300  | 3.20199400  |
| H   | 2.36997600  | -1.62152300 | 2.60967800  |
| H   | 0.74190600  | -2.20475300 | 2.96221400  |
| H   | 2.37959100  | -2.60825000 | 0.41587500  |
| H   | 1.79924200  | -3.81430700 | 1.55965300  |
| H   | -0.28345500 | 4.08011500  | 0.23084800  |
| H   | 0.60434700  | 2.98580700  | -0.83191300 |
| N   | 0.20991600  | -2.02692800 | -0.82283400 |
| N   | -0.80041500 | 0.56936300  | -1.64568400 |
| C   | 0.29591500  | -3.06346300 | 0.20312200  |
| C   | -1.53360800 | 2.86717100  | -1.07184300 |
| C   | -1.11897100 | -1.84948400 | -1.38208200 |
| H   | 0.87636700  | -2.22271800 | -1.56747000 |
| C   | -1.20026000 | -0.65241000 | -2.31114000 |
| C   | -1.37693300 | 1.80194200  | -2.15264500 |
| H   | -0.87026900 | 0.51549200  | -0.63076900 |
| H   | 0.28345500  | -4.08011500 | -0.23084800 |

|   |             |             |             |
|---|-------------|-------------|-------------|
| H | -0.60434700 | -2.98580700 | 0.83191300  |
| H | -2.37959100 | 2.60825000  | -0.41587500 |
| H | -1.79924200 | 3.81430700  | -1.55965300 |
| H | -1.80752700 | -1.68195300 | -0.53753900 |
| H | -1.48794200 | -2.74755100 | -1.91510500 |
| H | -2.24197400 | -0.59271600 | -2.68432500 |
| H | -0.57120800 | -0.83044300 | -3.20199400 |
| H | -2.36997600 | 1.62152300  | -2.60967800 |
| H | -0.74190600 | 2.20475300  | -2.96221400 |

Sum of electronic and thermal Free Energies= -613.787527

Frequencies -- 22.4749 45.3751 72.1406

**copper(II) cyclam dichloride**

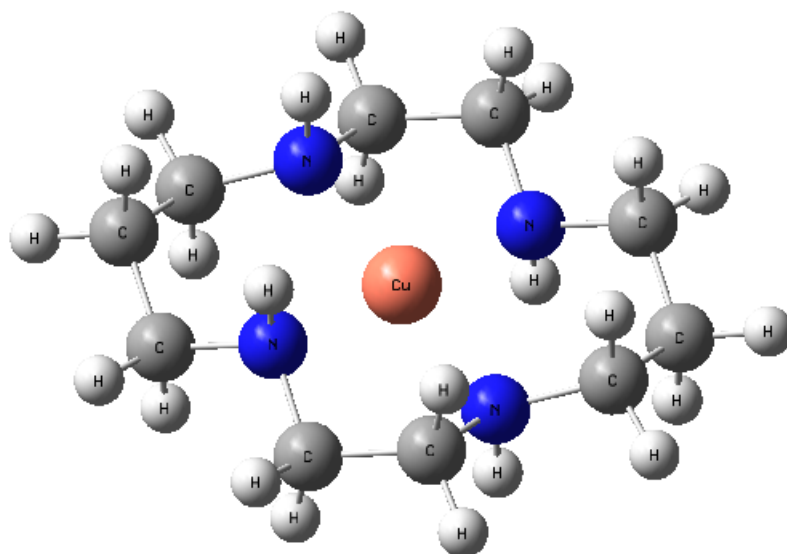

|     |             |             |             |
|-----|-------------|-------------|-------------|
| 2 2 |             |             |             |
| Cu  | 0.00000000  | 0.00000000  | 0.00000000  |
| N   | -0.01562900 | 1.88522700  | 0.75461100  |
| N   | 1.46471400  | -0.36896200 | 1.35765000  |
| C   | 1.22130700  | 2.03360400  | 1.55380200  |
| C   | 1.45119000  | 0.75567700  | 2.31940700  |
| C   | 1.41628600  | -1.68577000 | 2.03003100  |
| C   | 1.44788200  | -2.83846300 | 1.04716400  |
| C   | -0.18535800 | 2.98439800  | -0.22167500 |
| H   | -0.81353600 | 1.90827900  | 1.39630200  |
| H   | 2.33766200  | -0.32084800 | 0.82470900  |
| H   | 2.04571300  | 2.21805900  | 0.85322800  |
| H   | 1.15315800  | 2.89789600  | 2.22534800  |
| H   | 2.38524600  | 0.79293100  | 2.89286400  |
| H   | 0.63106200  | 0.57597300  | 3.02657500  |
| H   | 2.26149500  | -1.75714700 | 2.72843400  |
| H   | 0.49510400  | -1.71360000 | 2.62715600  |
| H   | 2.32708500  | -2.75764800 | 0.39034300  |
| H   | 1.58493300  | -3.76393900 | 1.61725800  |
| H   | -0.19208700 | 3.94041900  | 0.31980400  |
| H   | 0.70016200  | 2.98142600  | -0.87085700 |
| N   | 0.01562900  | -1.88522700 | -0.75461100 |
| N   | -1.46471400 | 0.36896200  | -1.35765000 |
| C   | 0.18535800  | -2.98439800 | 0.22167500  |
| C   | -1.44788200 | 2.83846300  | -1.04716400 |
| C   | -1.22130700 | -2.03360400 | -1.55380200 |
| H   | 0.81353600  | -1.90827900 | -1.39630200 |
| C   | -1.45119000 | -0.75567700 | -2.31940700 |
| C   | -1.41628600 | 1.68577000  | -2.03003100 |
| H   | -2.33766200 | 0.32084800  | -0.82470900 |
| H   | 0.19208700  | -3.94041900 | -0.31980400 |
| H   | -0.70016200 | -2.98142600 | 0.87085700  |
| H   | -2.32708500 | 2.75764800  | -0.39034300 |
| H   | -1.58493300 | 3.76393900  | -1.61725800 |
| H   | -2.04571300 | -2.21805900 | -0.85322800 |

|   |             |             |             |
|---|-------------|-------------|-------------|
| H | -1.15315800 | -2.89789600 | -2.22534800 |
| H | -2.38524600 | -0.79293100 | -2.89286400 |
| H | -0.63106200 | -0.57597300 | -3.02657500 |
| H | -2.26149500 | 1.75714700  | -2.72843400 |
| H | -0.49510400 | 1.71360000  | -2.62715600 |

Sum of electronic and thermal Free Energies= -2253.852408

Frequencies -- 37.9422 88.9160 117.5807

Relevant references to DFT Section:

1. Y. Zhao and D. Truhlar, *Theor. Chem. Acc.*, 2008, **120**, 215-241.
2. G. Scalmani and M. J. Frisch, *J. Chem. Phys.*, 2010, **132**, 114110-114115.
3. D. M. York and M. Karplus, *J. Phys. Chem. A*, 1999, **103**, 11060-11079.
4. Gaussian 09, Revision A.1, M. J. Frisch, G. W. Trucks, H. B. Schlegel, G. E. Scuseria, M. A. Robb, J. R. Cheeseman, G. Scalmani, V. Barone, B. Mennucci, G. A. Petersson, H. Nakatsuji, M. Caricato, X. Li, H. P. Hratchian, A. F. Izmaylov, J. Bloino, G. Zheng, J. L. Sonnenberg, M. Hada, M. Ehara, K. Toyota, R. Fukuda, J. Hasegawa, M. Ishida, T. Nakajima, Y. Honda, O. Kitao, H. Nakai, T. Vreven, J. Montgomery, J. A., J. E. Peralta, F. Ogliaro, M. Bearpark, J. J. Heyd, E. Brothers, K. N. Kudin, V. N. Staroverov, R. Kobayashi, J. Normand, K. Raghavachari, A. Rendell, J. C. Burant, S. S. Iyengar, J. Tomasi, M. Cossi, N. Rega, J. M. Millam, M. Klene, J. E. Knox, J. B. Cross, V. Bakken, C. Adamo, J. Jaramillo, R. Gomperts, R. E. Stratmann, O. Yazyev, A. J. Austin, R. Cammi, C. Pomelli, J. W. Ochterski, R. L. Martin, K. Morokuma, V. G. Zakrzewski, G. A. Voth, P. Salvador, J. J. Dannenberg, S. Dapprich, A. D. Daniels, Ö. Farkas, J. B. Foresman, J. V. Ortiz, J. Cioslowski and D. J. Fox, Gaussian, Inc., Wallingford CT, 2009.
